# Supplementary material
Source: publisher figshare collection journal article supplement (https://geolsoc.figshare.com/ndownloader/files/5424272)
Supplement: Supplementary file 1 [file 5424272]

Supplementary information 2. Flow areas, volumes, and stratigraphic ages
					Volumes using maximum thickness				Volumes using average thickness
ObjectID	Length (m)	Area (m2)	Area extrapolated (m2)	Max thickness (m)	Vol (m3)	Vol (km3)	CumVol (km3)	Ave thickness (m)	Vol (m3)	Vol (km3)	CumVol (km3)	Absolute age (ka)	Preferred age (ka)	Max stratigraphic age (ka)	Min stratigraphic age (ka)	Comment
77	4011	603455	954334	101	96387772	0.10	0.10	26	24812694	0.02	0.02		1050	1050	1018
78	5133	1026688	1720798	101	173800617	0.17	0.27	26	44740753	0.04	0.07		1050	1050	1018
189		772151			624072834	0.62	0.89		624072834	0.62	0.69	1050	1050	1050	1018	SDome2
65	3285	526700	788032	101	79591228	0.08	0.97	26	20488831	0.02	0.71		1041	1050	1018
70	5258	1108254	1463877	101	147851582	0.15	1.12	26	38060803	0.04	0.75		1041	1050	1018
190		449138			343529191	0.34	1.47		343529191	0.34	1.10	1041	1041	1050	1018	SDome1
55	4547	1104607	3244331	101	327677385	0.33	1.79	26	84352594	0.08	1.18		1028	1050	1018
56	7071	1821239	3724797	101	376204478	0.38	2.17	26	96844717	0.10	1.28		1028	1050	1018
57	5229	941924	4246976	101	428944526	0.43	2.60	26	110421363	0.11	1.39	1028	1028	1050	1018
58	2825	506885	1751337	101	176885040	0.18	2.77	26	45534763	0.05	1.43		1028	1050	1018
59	3257	720681	3549719	101	358521643	0.36	3.13	26	92292700	0.09	1.53		1028	1050	1018
61	6961	2001874	2638609	101	266499470	0.27	3.40	26	68603824	0.07	1.59		1018	1050	1018
79	4732	1150648	1798617	101	181660291	0.18	3.58	26	46764035	0.05	1.64		1018	1050	1018
80	5296	857357	1425787	101	144004488	0.14	3.73	26	37070462	0.04	1.68		1018	1050	1018
84	3870	911239	2807098	101	283516898	0.28	4.01	26	72984548	0.07	1.75	1018	1018	1050	1018
91	5541	1563661	2585770	101	261162765	0.26	4.27	26	67230019	0.07	1.82		1018	1050	1018
93	9948	2893720	6678313	101	674509657	0.67	4.94	26	173636149	0.17	1.99		1018	1050	1018
54	7078	2214652	5139068	84	431681733	0.43	5.38	36	185006457	0.19	2.18	890	890	890	890
15	4270	970838	4137431	59	244108458	0.24	5.62	18	74473767	0.07	2.25		714	714	660
16	8491	2183136	7740030	59	456661755	0.46	6.08	18	139320535	0.14	2.39		714	714	660
29	4622	736701	2397054	59	141426192	0.14	6.22	18	43146974	0.04	2.43	714	714	714	660
30	1785	210658	1459545	59	86113142	0.09	6.30	18	26271806	0.03	2.46		714	714	660
31	4793	640108	2918759	59	172206787	0.17	6.48	18	52537664	0.05	2.51		714	714	660
34	4096	759158	2134312	59	125924405	0.13	6.60	18	38417615	0.04	2.55		714	714	660
39	2750	458544	1595328	59	94124364	0.09	6.70	18	28715908	0.03	2.58		690	714	660
40	3317	750759	2209370	59	130352803	0.13	6.83	18	39768652	0.04	2.62		690	714	660
41	3119	524815	2130997	59	125728816	0.13	6.95	18	38357944	0.04	2.66		690	714	660
12	10188	3737169	6042432	59	356503499	0.36	7.31	18	108763779	0.11	2.77		666	714	660
13	10633	3059468	6484502	59	382585623	0.38	7.69	18	116721038	0.12	2.88	660	660	714	660
14	6947	2026144	6319834	59	372870215	0.37	8.07	18	113757015	0.11	3.00		660	714	660
22	2519	208958	2281891	138	314900997	0.31	8.38	53	120940238	0.12	3.12		595	595	505
23	2871	438044	2608373	138	359955449	0.36	8.74	53	138243759	0.14	3.26		595	595	505
24	3297	449749	3073809	138	424185679	0.42	9.16	53	162911891	0.16	3.42		595	595	505
25	3753	616730	2279070	138	314511719	0.31	9.48	53	120790733	0.12	3.54		595	595	505
26	4217	737374	1721421	138	237556060	0.24	9.72	53	91235298	0.09	3.63		595	595	505
85	4724	808613	1692249	138	233530398	0.23	9.95	53	89689211	0.09	3.72		595	595	505
87	6667	1336826	2324124	138	320729060	0.32	10.27	53	123178552	0.12	3.84		595	595	505
89	5372	866949	1200772	138	165706489	0.17	10.44	53	63640898	0.06	3.91		595	595	505
90	3595	839733	2204457	138	304215069	0.30	10.74	53	116836222	0.12	4.02		595	595	505
99	2738	341382	749689	138	103457114	0.10	10.84	53	39733529	0.04	4.06	595	595	595	505
135	2574	424079	566828	138	78222198	0.08	10.92	53	30041859	0.03	4.09		595	595	505
136	2722	484716	1655975	138	228524527	0.23	11.15	53	87766666	0.09	4.18		595	595	505
137	2692	452717	2013888	138	277916569	0.28	11.43	53	106736074	0.11	4.29		595	595	505
140	6005	1287527	679093	138	93714787	0.09	11.52	53	35991911	0.04	4.32		595	595	505
141	3121	352006	1449399	138	200017083	0.20	11.72	53	76818155	0.08	4.40		595	595	505
142	2440	251947	725855	138	100167926	0.10	11.82	53	38470290	0.04	4.44		595	595	505
152	2554	252439	764112	138	105447477	0.11	11.93	53	40497944	0.04	4.48		595	595	505
154	5454	1222004	694646	138	95861102	0.10	12.02	53	36816221	0.04	4.52		595	595	505
161	1833	134287	5632559	138	777293190	0.78	12.80	53	298525645	0.30	4.82		595	595	505
162	1358	85579	2146090	138	296160415	0.30	13.10	53	113742768	0.11	4.93		595	595	505
163	1300	104622	1320163	138	182182464	0.18	13.28	53	69968628	0.07	5.00		595	595	505
164	2959	391656	1639463	138	226245859	0.23	13.51	53	86891526	0.09	5.09		595	595	505
180	1498	125161	179276	138	24740045	0.02	13.53	53	9501612	0.01	5.10		595	595	505
124	1547	141558	418892	138	57807063	0.06	13.59	53	22201263	0.02	5.12		590	595	505
191		1668787			258897894	0.26	13.85		258897894	0.26	5.38	590	590	595	505	NWDome1
192		1344644			171926450	0.17	14.02		171926450	0.17	5.55	585	585	595	505	NWDome2
104	2586	513418	1868303	138	257825757	0.26	14.28	53	99020037	0.10	5.65		585	595	505
125	1743	158594	297809	138	41097622	0.04	14.32	53	15783869	0.02	5.66		585	595	505
188	1944	221000	102495	138	14144318	0.01	14.33	53	5432238	0.01	5.67		580	595	505
17	3683	798487	2392572	138	330174928	0.33	14.66	53	126806313	0.13	5.80		579	595	505
18	5714	1257532	2320907	138	320285207	0.32	14.98	53	123008087	0.12	5.92		579	595	505
19	1578	181844	1035704	138	142927166	0.14	15.13	53	54892317	0.05	5.97		579	595	505
20	1203	98952	629058	138	86809941	0.09	15.21	53	33340050	0.03	6.01		579	595	505
21	4815	1001421	2537227	138	350137344	0.35	15.56	53	134473038	0.13	6.14		579	595	505
27	4000	684605	1311932	138	181046656	0.18	15.74	53	69532411	0.07	6.21		579	595	505
28	2867	306899	1121068	138	154707396	0.15	15.90	53	59416609	0.06	6.27		579	595	505
32	3160	526624	2095493	138	289178064	0.29	16.19	53	111061140	0.11	6.38		579	595	505
33	3885	665692	1353329	138	186759340	0.19	16.37	53	71726413	0.07	6.45		579	595	505
50	2161	210966	1200639	138	165688141	0.17	16.54	53	63633851	0.06	6.52		579	595	505
52	4584	597967	654565	138	90329964	0.09	16.63	53	34691943	0.03	6.55		579	595	505
126	1447	128656	435985	138	60165865	0.06	16.69	53	23107180	0.02	6.57	579	579	595	505
148	4482	827691	1488895	138	205467447	0.21	16.90	53	78911411	0.08	6.65		579	595	505
149	3427	410721	2432565	138	335693981	0.34	17.23	53	128925949	0.13	6.78		579	595	505
155	3688	538857	1009707	138	139339630	0.14	17.37	53	53514496	0.05	6.84		579	595	505
156	5222	737064	2889899	138	398806094	0.40	17.77	53	153164659	0.15	6.99		579	595	505
157	2462	218704	1819020	138	251024733	0.25	18.02	53	96408050	0.10	7.09		579	595	505
158	2483	330226	3208269	138	442741082	0.44	18.46	53	170038242	0.17	7.26		579	595	505
159	6307	1175821	1384190	138	191018179	0.19	18.65	53	73362054	0.07	7.33		579	595	505
160	2075	147125	1856936	138	256257182	0.26	18.91	53	98417614	0.10	7.43		579	595	505
170	2930	299589	633094	138	87366925	0.09	19.00	53	33553964	0.03	7.46		579	595	505
171	1946	177487	862311	138	118998984	0.12	19.12	53	45702508	0.05	7.51		579	595	505
185	1100	66490	279133	138	38520365	0.04	19.16	53	14794053	0.01	7.52		579	595	505
49	4725	799338	1205595	138	166372092	0.17	19.32	53	63896528	0.06	7.59		570	595	505
146	6002	1158395	417598	138	57628485	0.06	19.38	53	22132679	0.02	7.61		570	595	505
147	4539	700714	2584120	138	356608501	0.36	19.74	53	136958337	0.14	7.74		570	595	505
138	2508	234182	1332257	138	183851408	0.18	19.92	53	70609599	0.07	7.82		560	595	505
143	2729	387270	1235027	138	170433793	0.17	20.09	53	65456457	0.07	7.88		560	595	505
144	2783	271864	750052	138	103507239	0.10	20.19	53	39752780	0.04	7.92		560	595	505
151	3393	485916	1669626	138	230408372	0.23	20.42	53	88490172	0.09	8.01		550	595	505
60	2108	281548	2218024	138	306087349	0.31	20.73	53	117555286	0.12	8.13	549	549	595	505
67	2578	455942	1273788	138	175782682	0.18	20.91	53	67510740	0.07	8.19		549	595	505
82	1415	121343	397478	138	54852009	0.05	20.96	53	21066351	0.02	8.21		549	595	505
83	1669	179010	456621	138	63013640	0.06	21.02	53	24200891	0.02	8.24		549	595	505
86	5089	1130267	1549079	138	213772853	0.21	21.24	53	82101168	0.08	8.32		549	595	505
88	5977	1321513	1536408	138	212024255	0.21	21.45	53	81429605	0.08	8.40		549	595	505
127	4339	597856	505034	138	69694643	0.07	21.52	53	26766783	0.03	8.43		549	595	505
128	3598	648798	1225930	138	169178298	0.17	21.69	53	64974274	0.06	8.49		549	595	505
130	1109	90361	965101	138	133183911	0.13	21.82	53	51150343	0.05	8.55		549	595	505
133	1897	194531	2112620	138	291541599	0.29	22.11	53	111968875	0.11	8.66		549	595	505
145	1434	117548	449635	138	62049647	0.06	22.18	53	23830661	0.02	8.68		549	595	505
193		700448			455789132	0.46	22.63		455789132	0.46	9.14	549	549	595	505	Wdome
105	4526	716027	1488658	138	205434789	0.21	22.84	53	78898868	0.08	9.22		545	595	505
9	21725	14793769	15223135	138	2100792649	2.10	24.94	53	806826162	0.81	10.02	544	544	595	505
150	1805	215132	590254	138	81455115	0.08	25.02	53	31283486	0.03	10.05		520	595	505
81	9746	4088382	6379055	138	880309570	0.88	25.90	53	338089907	0.34	10.39	519	519	595	505
92	5601	1069163	1793484	138	247500767	0.25	26.15	53	95054642	0.10	10.49		519	595	505
94	8025	2417463	4016984	138	554343827	0.55	26.70	53	212900165	0.21	10.70		519	595	505
139	2152	248370	554325	138	76496893	0.08	26.78	53	29379241	0.03	10.73		515	595	505
35	3824	810149	1686813	138	232780247	0.23	27.01	53	89401109	0.09	10.82		512	595	505
36	2872	545784	2491828	138	343872199	0.34	27.35	53	132066859	0.13	10.95		512	595	505
38	6309	2174324	5609950	138	774173048	0.77	28.13	53	297327330	0.30	11.25	512	512	595	505
53	9589	2994365	4035977	138	556964849	0.56	28.69	53	213906790	0.21	11.46		512	595	505
102	3574	699038	1893885	138	261356089	0.26	28.95	53	100375889	0.10	11.56		512	595	505
153	3236	291693	1519161	138	209644245	0.21	29.16	53	80515544	0.08	11.64		512	595	505
98	4226	505936	1170564	138	161537857	0.16	29.32	53	62039902	0.06	11.71		510	595	505
37	5984	1552674	3485894	138	481053312	0.48	29.80	53	184752359	0.18	11.89	505	505	595	505
42	3427	715685	1446567	138	199626241	0.20	30.00	53	76668049	0.08	11.97		505	595	505
43	7372	1452741	2445544	138	337485062	0.34	30.34	53	129613828	0.13	12.10		505	595	505
47	3397	556929	1411226	138	194749252	0.19	30.53	53	74795003	0.07	12.17		505	595	505
95	5798	882194	1139571	138	157260811	0.16	30.69	53	60397268	0.06	12.23		505	595	505
96	5711	901321	1084519	138	149663556	0.15	30.84	53	57479482	0.06	12.29		505	595	505
97	4128	630696	1107889	138	152888748	0.15	30.99	53	58718142	0.06	12.35		505	595	505
103	3187	578229	1334597	138	184174431	0.18	31.17	53	70733658	0.07	12.42		505	595	505
108	9038	2346347	2557363	138	352916158	0.35	31.53	53	135540263	0.14	12.55		505	595	505
123	3413	337468	267255	138	36881225	0.04	31.56	53	14164529	0.01	12.57		505	595	505
131	3283	396758	1012288	138	139695702	0.14	31.70	53	53651248	0.05	12.62		505	595	505
132	4194	572627	1247381	138	172138561	0.17	31.88	53	66111186	0.07	12.69		505	595	505
134	4128	269044	1572936	138	217065207	0.22	32.09	53	83365623	0.08	12.77		505	595	505
122	2558	226768	276954	94	26033665	0.03	32.12	25	6923847	0.01	12.78	458	458	458	387
44	4213	569265	700306	94	65828790	0.07	32.19	25	17507657	0.02	12.80		455	458	387
45	7093	2475183	3117015	94	292999427	0.29	32.48	25	77925379	0.08	12.87	455	455	458	387
46	4565	934770	1335818	94	125566927	0.13	32.60	25	33395459	0.03	12.91	455	455	458	387
100	4318	719652	997798	94	93793040	0.09	32.70	25	24944957	0.02	12.93		430	458	387
101	1961	226303	742656	94	69809619	0.07	32.77	25	18566388	0.02	12.95		430	458	387
119	2183	285821	1855571	94	174423692	0.17	32.94	25	46389280	0.05	13.00		430	458	387
129	4446	469560	1660573	94	156093875	0.16	33.10	25	41514328	0.04	13.04		430	458	387
68	2023	276628	536540	94	50434805	0.05	33.15	25	13413512	0.01	13.05	427	427	458	387
177	1894	86072	122610	94	11525303	0.01	33.16	25	3065240	0.00	13.05	415	415	458	387
186	1567	93688	231917	94	21800170	0.02	33.18	25	5797917	0.01	13.06		415	458	387
121	1549	162832	112053	94	10533003	0.01	33.19	25	2801331	0.00	13.06		410	458	387
63	9052	1926433	2285205	94	214809285	0.21	33.41	25	57130129	0.06	13.12	407	407	458	387
69	1510	131302	273960	94	25752234	0.03	33.43	25	6848998	0.01	13.13		407	458	387
172	2814	239794	1165145	94	109523652	0.11	33.54	25	29128631	0.03	13.16		407	458	387
173	1403	77257	975858	94	91730659	0.09	33.63	25	24396452	0.02	13.18		407	458	387
62	6438	1328455	1534864	94	144277173	0.14	33.78	25	38371589	0.04	13.22	405.8	405.8	458	387
64	5490	1158116	1704806	94	160251798	0.16	33.94	25	42620159	0.04	13.26		405.8	458	387
66	6647	1459049	2023707	94	190228424	0.19	34.13	25	50592666	0.05	13.31		405.8	458	387
74	2549	247552	841362	94	79088036	0.08	34.21	25	21034052	0.02	13.33		405.8	458	387
75	2790	408425	989834	94	93044357	0.09	34.30	25	24745840	0.02	13.36		405.8	458	387
10	2380	214917	433151	94	40716217	0.04	34.34	25	10828781	0.01	13.37		401	458	387
11	3470	591932	975575	94	91704076	0.09	34.43	25	24389382	0.02	13.39		401	458	387
71	1756	133051	238656	94	22433693	0.02	34.46	25	5966408	0.01	13.40		401	458	387
72	3172	401420	470487	94	44225805	0.04	34.50	25	11762182	0.01	13.41		401	458	387
73	2207	219096	275350	94	25882901	0.03	34.53	25	6883750	0.01	13.42		401	458	387
175	1096	62550	81497	94	7660760	0.01	34.53	25	2037436	0.00	13.42	401	401	458	387
176	1206	83533	153976	94	14473733	0.01	34.55	25	3849397	0.00	13.42		401	458	387
178	2124	121027	171563	94	16126945	0.02	34.56	25	4289081	0.00	13.43		401	458	387
182	2831	317834	200216	94	18820317	0.02	34.58	25	5005403	0.01	13.43		401	458	387
76	3917	583613	911648	94	85694902	0.09	34.67	25	22791197	0.02	13.46		400	458	387
120	1841	107709	446031	94	41926950	0.04	34.71	25	11150785	0.01	13.47		400	458	387
113	1678	127055	270465	94	25423667	0.03	34.74	25	6761613	0.01	13.47	387	387	458	387
109	2659	358725	534615	150	80192179	0.08	34.82	27	14434592	0.01	13.49	316	316	316	250
112	2460	290497	673017	150	100952515	0.10	34.92	27	18171453	0.02	13.51		316	316	250
114	3199	561252	1233503	150	185025485	0.19	35.10	27	33304587	0.03	13.54		316	316	250
115	2370	209050	951943	150	142791438	0.14	35.25	27	25702459	0.03	13.57		316	316	250
116	4067	632071	1121936	150	168290390	0.17	35.41	27	30292270	0.03	13.60		316	316	250
110	2349	215635	369963	150	55494459	0.06	35.47	27	9989003	0.01	13.61		310	316	250
51	3338	519935	842635	150	126395313	0.13	35.60	27	22751156	0.02	13.63		301	316	250
187	2013	146706	247260	150	37088973	0.04	35.63	27	6676015	0.01	13.64	301	301	458	387
111	2559	284938	590767	150	88615038	0.09	35.72	27	15950707	0.02	13.65		300	316	250
7	3713	667725	1098957	150	164843520	0.16	35.89	27	29671834	0.03	13.68		286	316	250
8	2082	207285	744046	150	111606955	0.11	36.00	27	20089252	0.02	13.70		286	316	250
117	3367	323355	727550	150	109132559	0.11	36.11	27	19643861	0.02	13.72	286	286	316	250
165	3975	347714	1145962	150	171894294	0.17	36.28	27	30940973	0.03	13.75		286	316	250
166	1419	82744	1771740	150	265760968	0.27	36.54	27	47836974	0.05	13.80		286	316	250
167	3867	408122	469829	150	70474350	0.07	36.61	27	12685383	0.01	13.81		286	316	250
183	1881	113806	237225	150	35583760	0.04	36.65	27	6405077	0.01	13.82		286	316	250
184	907	50663	322019	150	48302831	0.05	36.70	27	8694510	0.01	13.83		286	316	250
174	1480	124899	287463	150	43119496	0.04	36.74	27	7761509	0.01	13.83	271	271	316	250
179	1839	114740	133108	150	19966198	0.02	36.76	27	3593916	0.00	13.84		271	316	250
181	1580	105426	190011	150	28501637	0.03	36.79	27	5130295	0.01	13.84		271	316	250
0	7413	1193085	1480502	150	222075229	0.22	37.01	27	39973541	0.04	13.88		270	316	250
3	5345	1491304	2614690	150	392203541	0.39	37.40	27	70596637	0.07	13.95		270	316	250
4	5103	938132	1429757	150	214463580	0.21	37.62	27	38603444	0.04	13.99		270	316	250
106	3208	590337	714715	150	107207290	0.11	37.73	27	19297312	0.02	14.01		270	316	250
118	4089	708491	423566	150	63534894	0.06	37.79	27	11436281	0.01	14.02	270	270	316	250
168	3232	422559	326254	150	48938056	0.05	37.84	27	8808850	0.01	14.03		270	316	250
169	3269	368715	771583	150	115737513	0.12	37.95	27	20832752	0.02	14.05		270	316	250
1	7419	3225062	5766355	150	864953282	0.86	38.82	27	155691591	0.16	14.21	267	267	316	250
2	6754	1992177	3548904	150	532335623	0.53	39.35	27	95820412	0.10	14.30		267	316	250
5	5262	1516884	1972908	150	295936139	0.30	39.65	27	53268505	0.05	14.36		267	316	250
6	5595	840836	2101860	150	315279068	0.32	39.96	27	56750232	0.06	14.41		267	316	250
48	3760	437515	518200	150	77729955	0.08	40.04	27	13991392	0.01	14.43	250	250	316	250
107	4204	558737	653368	150	98005167	0.10	40.14	27	17640930	0.02	14.45		250	316	250
